# Supplementary material for: Reproducibility of individual effect sizes in meta-analyses in psychology
Source: PLOS journal article supplement (doi:10.1371/journal.pone.0233107), 2020-05-27

## Reproducibility of Individual Effect Sizes in Meta-Analyses in Psychology Supplement D. Reported vs Reproduced primary study effect sizes

Supplement D contains for each meta-analysis separately the primary study effect sizes as reported (the horizontal axis) and the primary study effect sizes as reproduced (the vertical axis). All data points on the diagonal line indicate Reproducible between reported and reproduced primary study effect sizes. In the plot, the original meta-analytic effect size estimate (as we computed it from the reported primary study effect sizes), as well as the reproduced meta-analytic effect size estimate are given. The  $k$  in the title refers to the number of primary study effect sizes we reproduced.

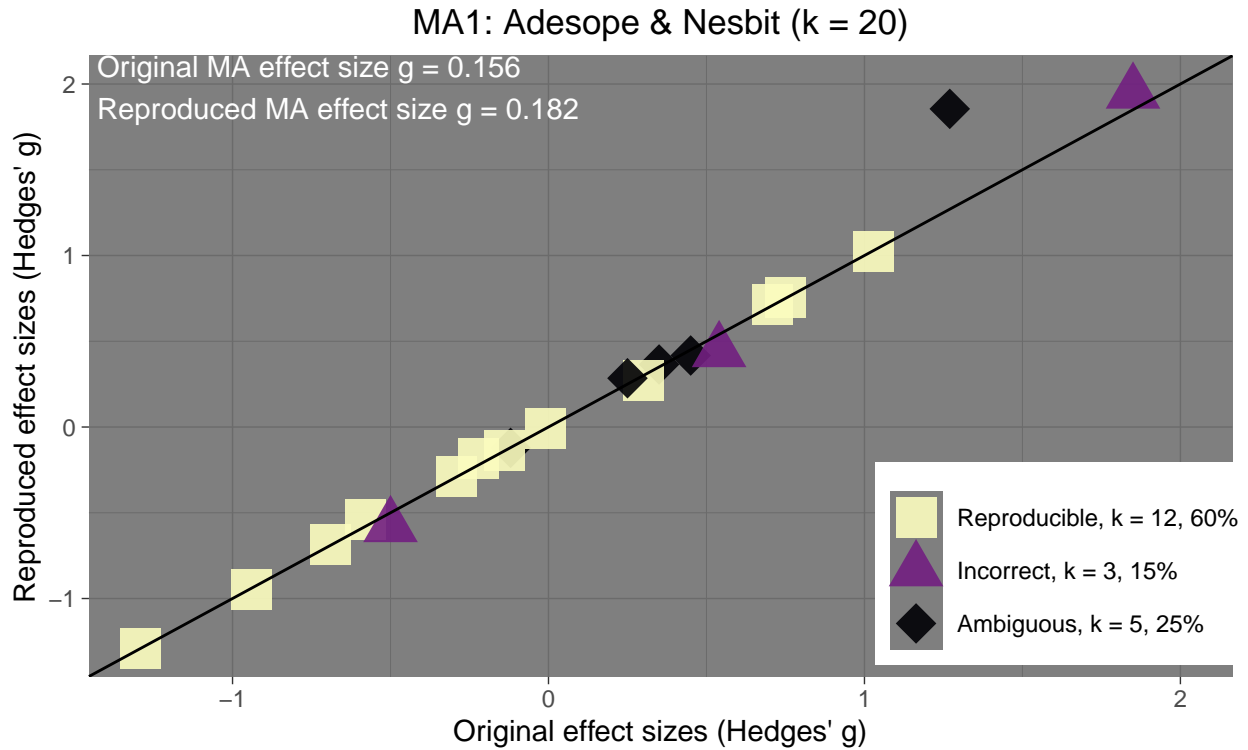

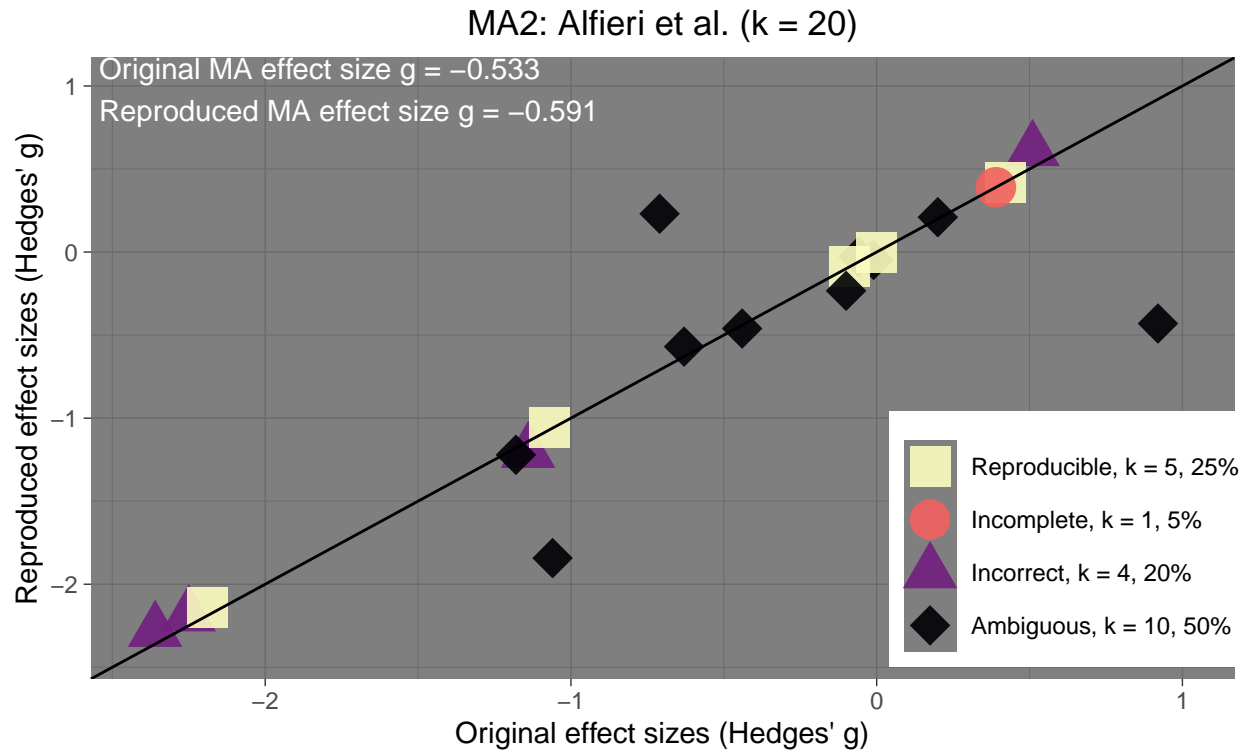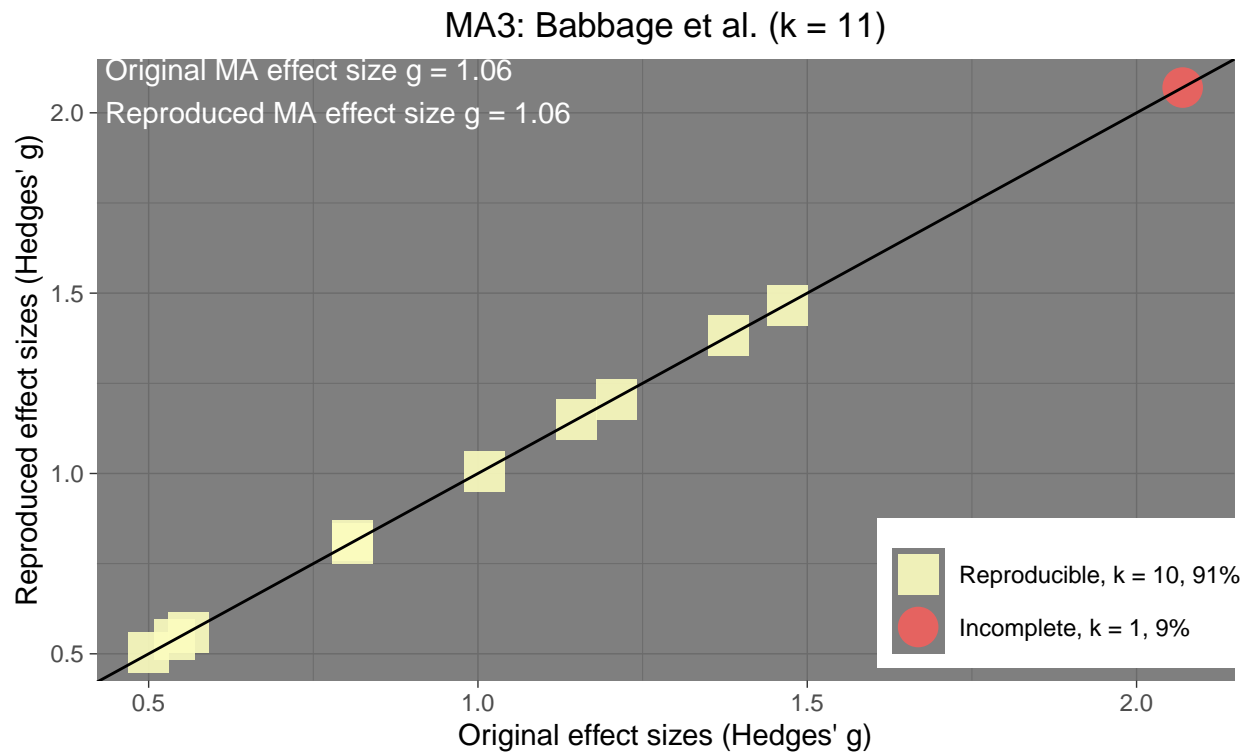

MA4: Balliet et al. (k = 21)

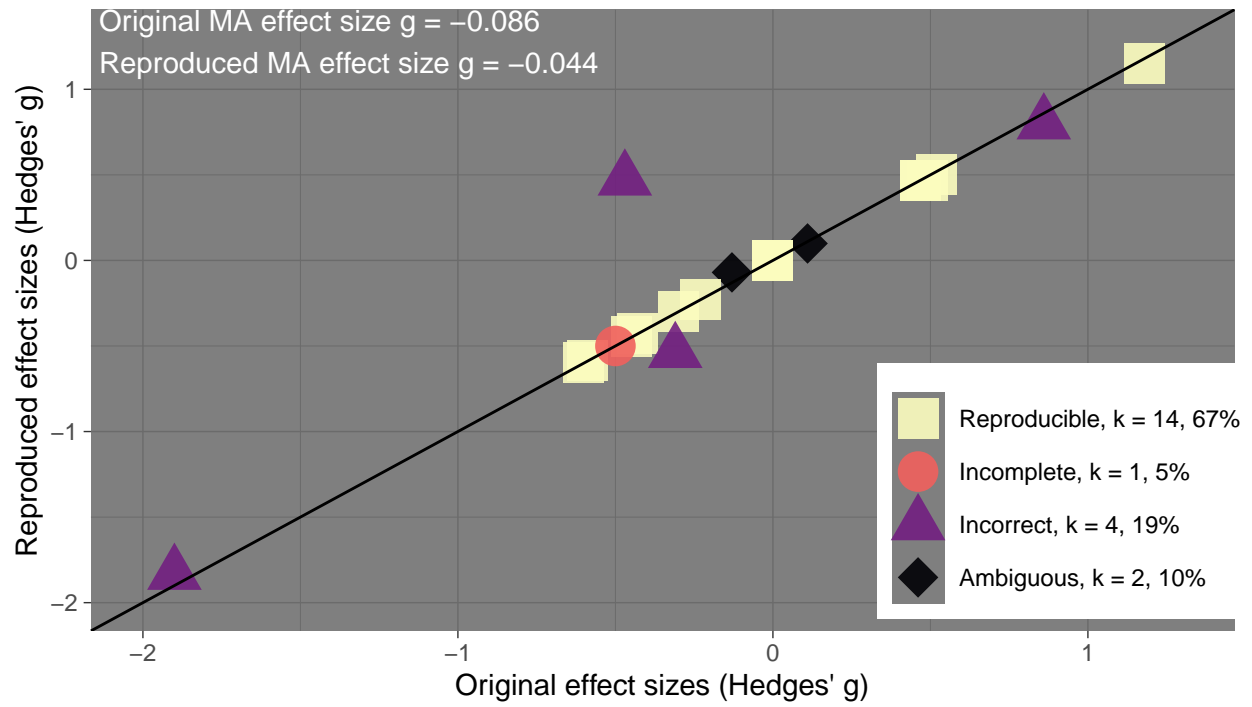

MA5: Benish et al. (k = 11)

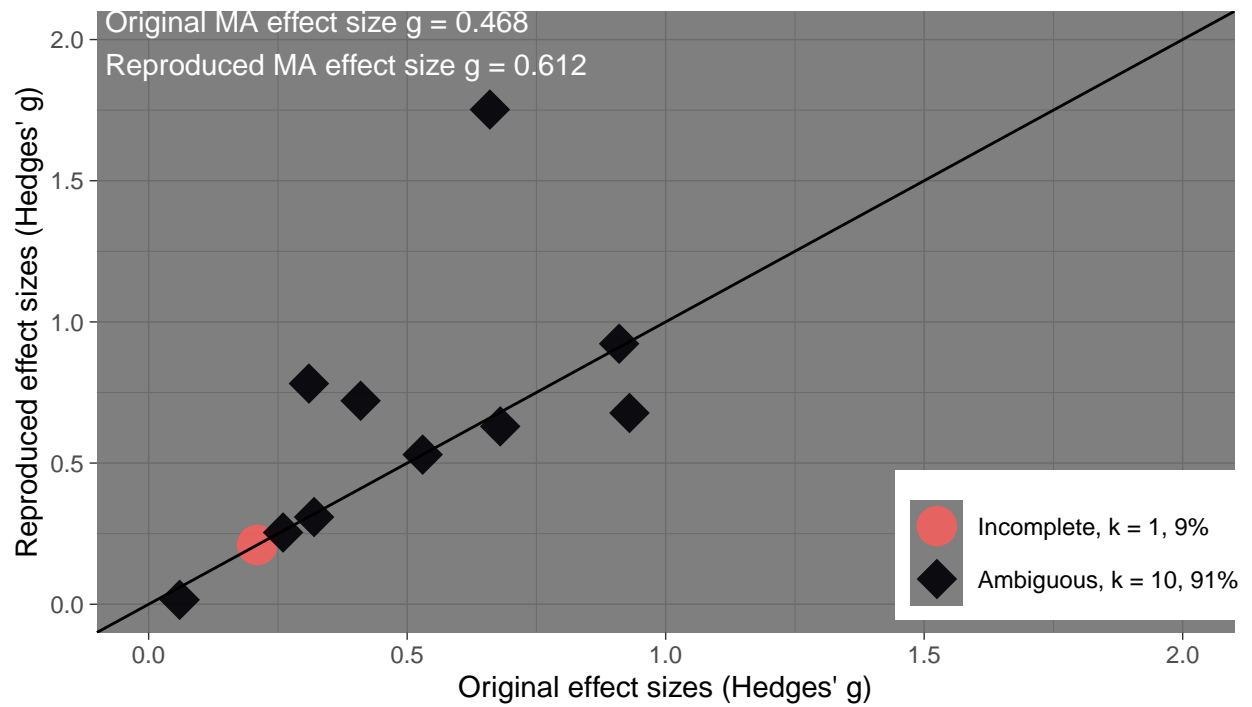

MA6: Berry, Carpenter & Barrat (k = 11)

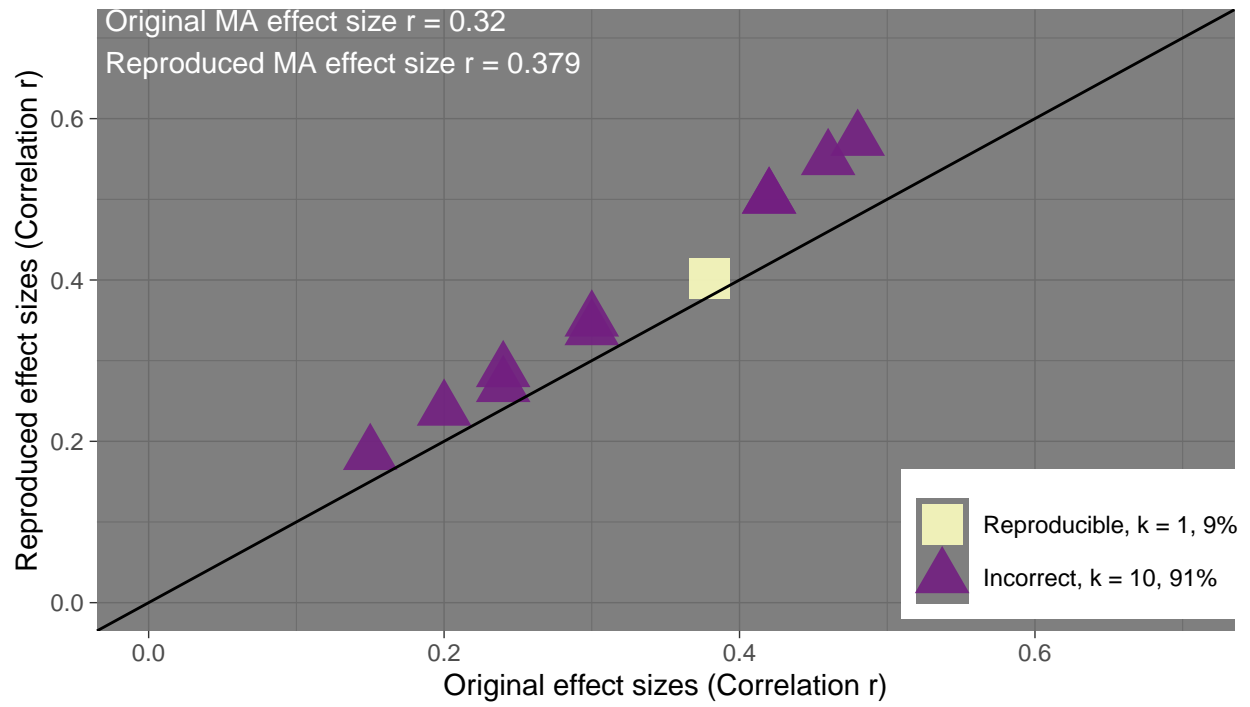

MA7: Berry, Clark, & McClure (k = 23)

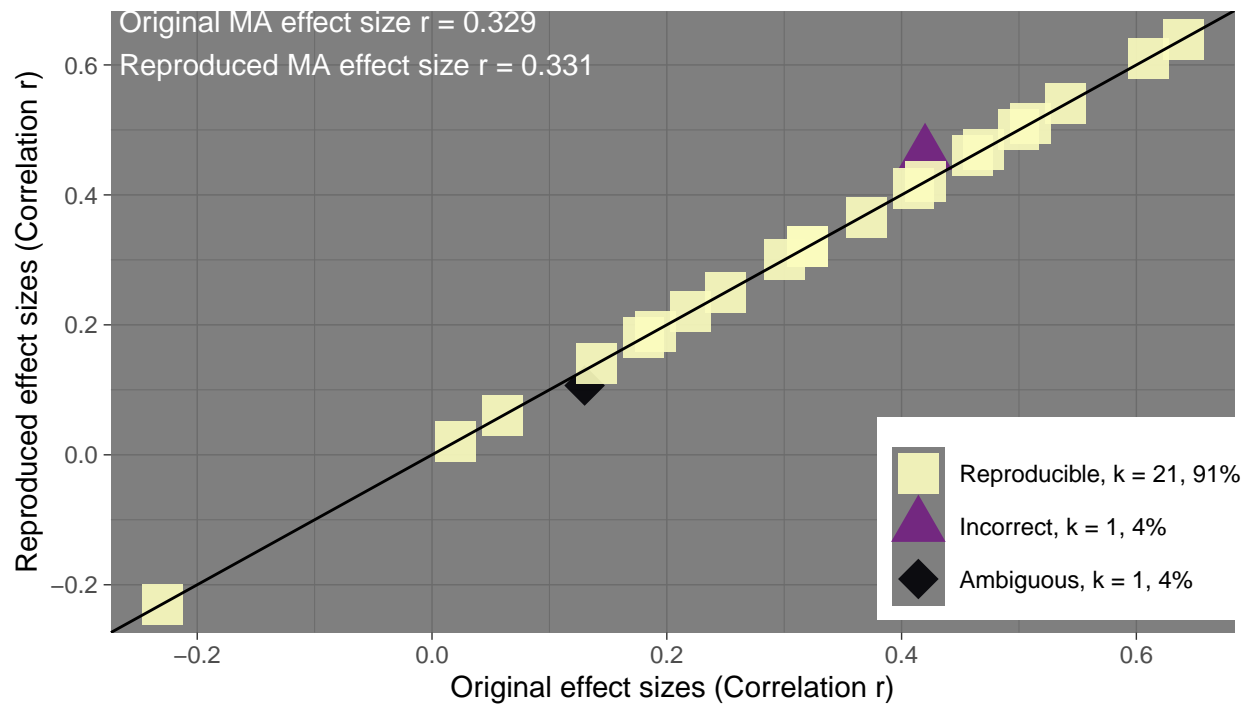

MA8: Card et al. (k = 9)

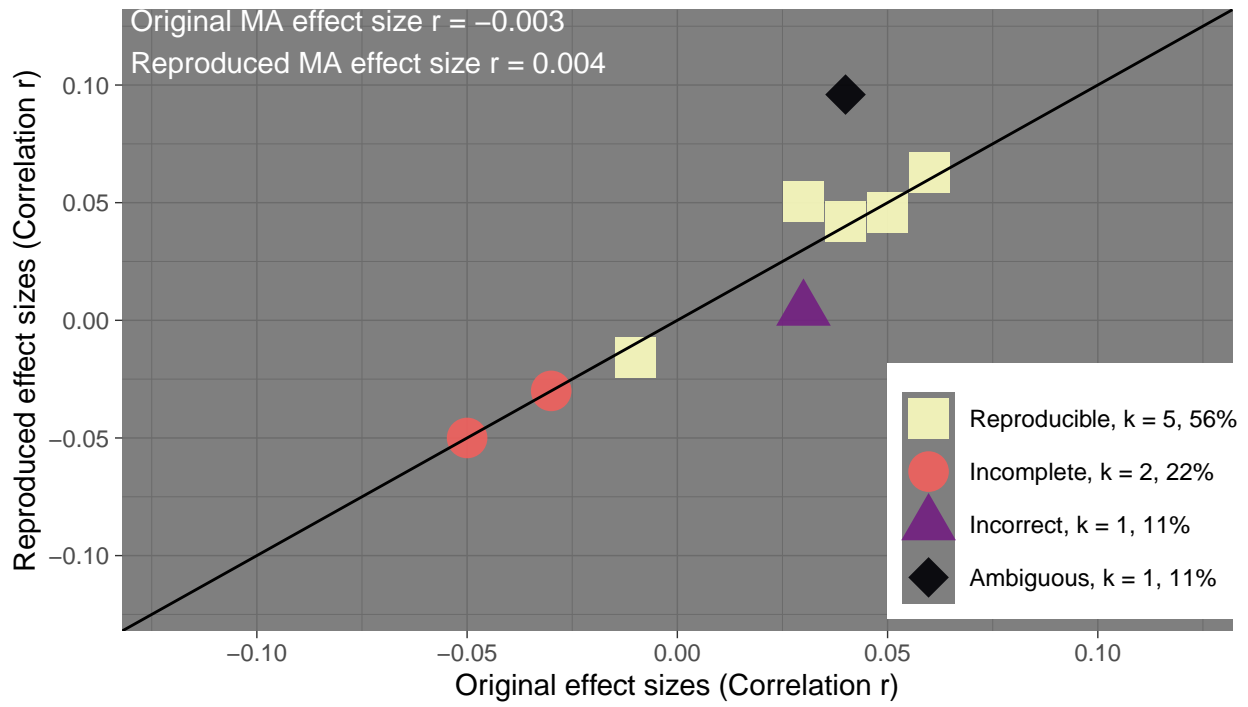

MA9: Crook et al. (k = 22)

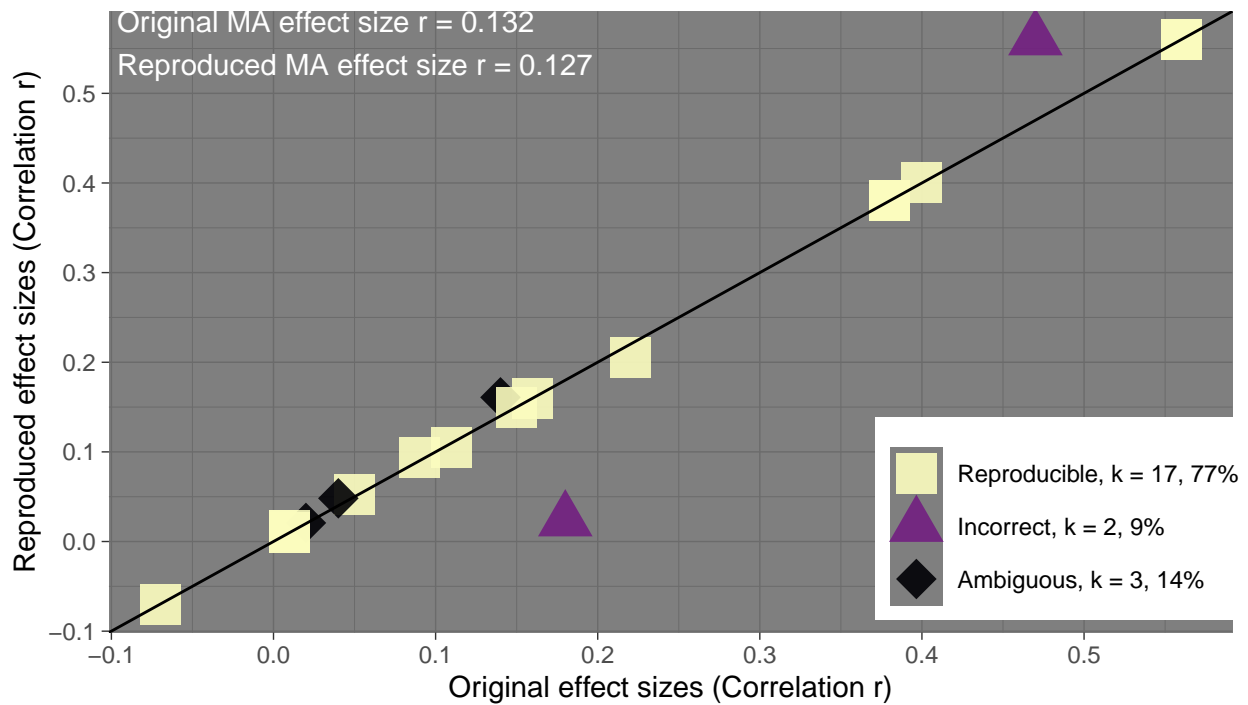

MA10: de Wit et al. (k = 21)

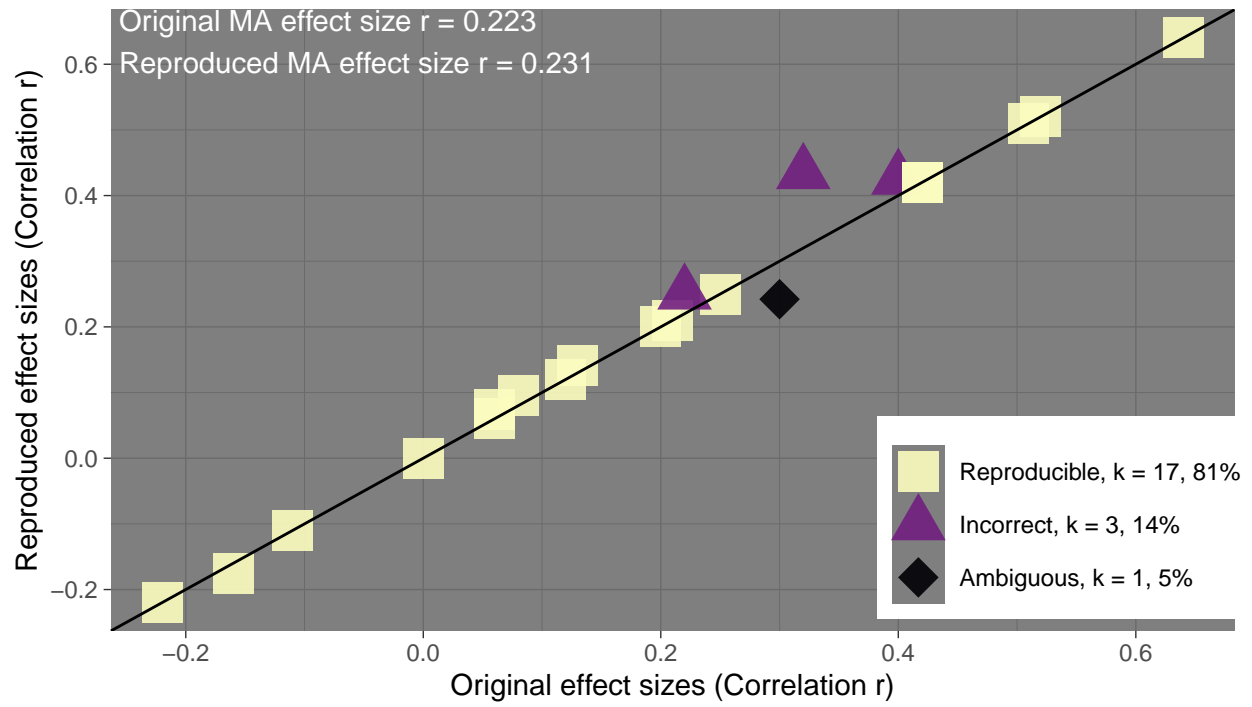

MA11: Else-Quest et al. (k = 20)

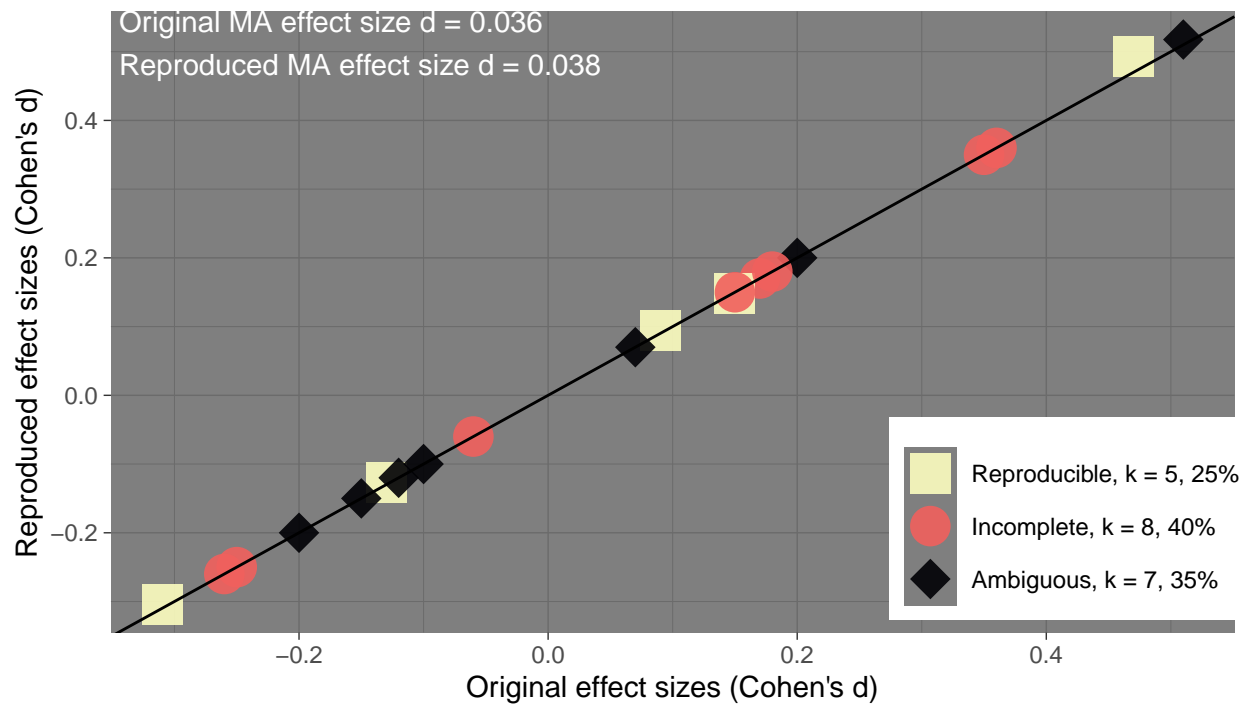

### MA12: Farber & Doolin (k = 11)

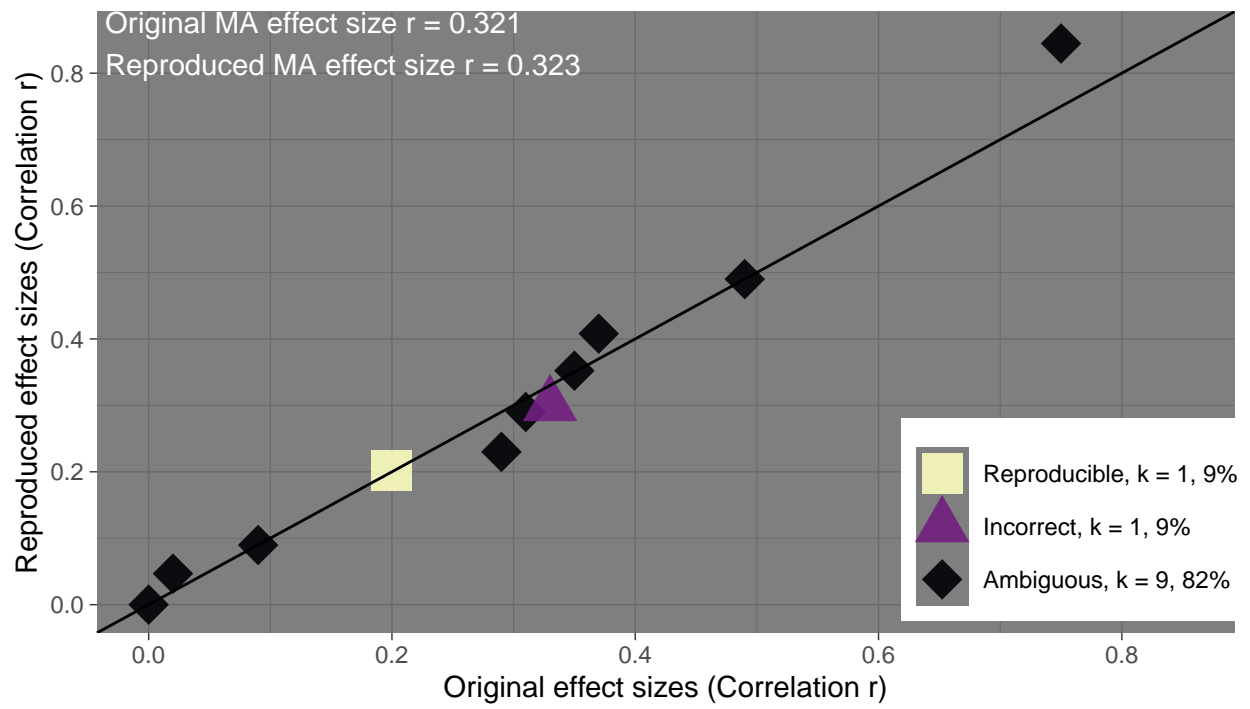

### MA13: Fischer et al. (k = 20)

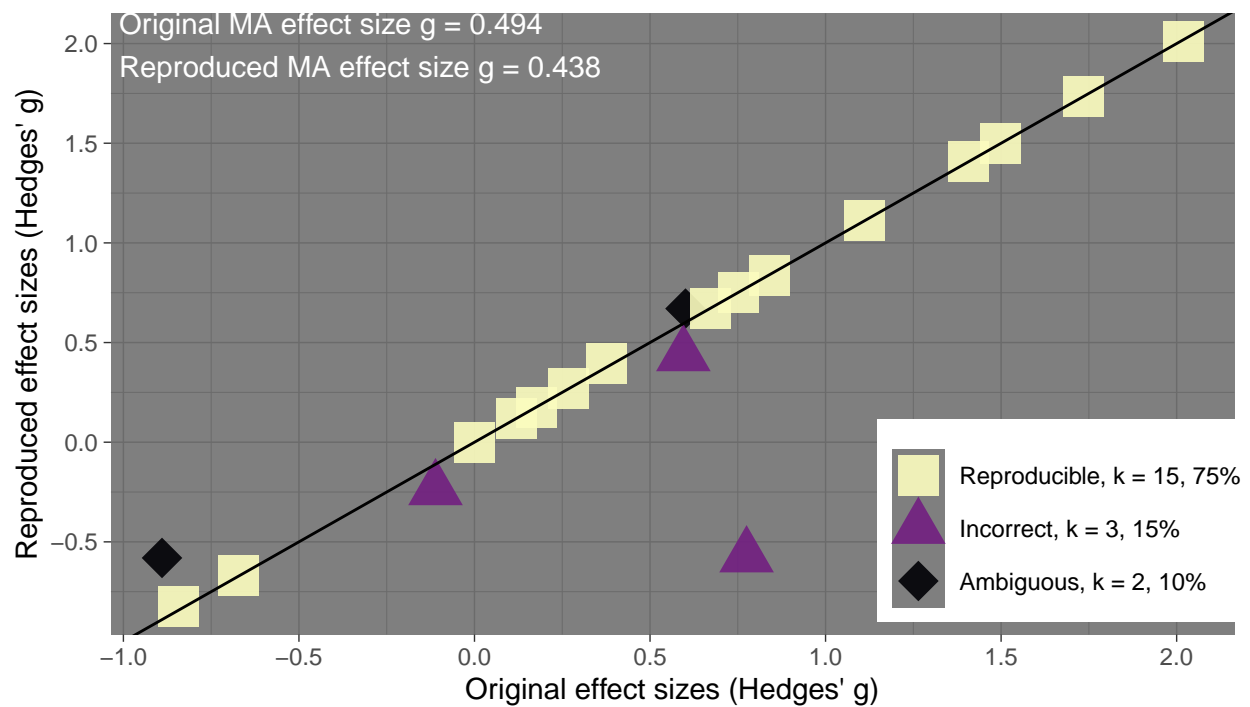

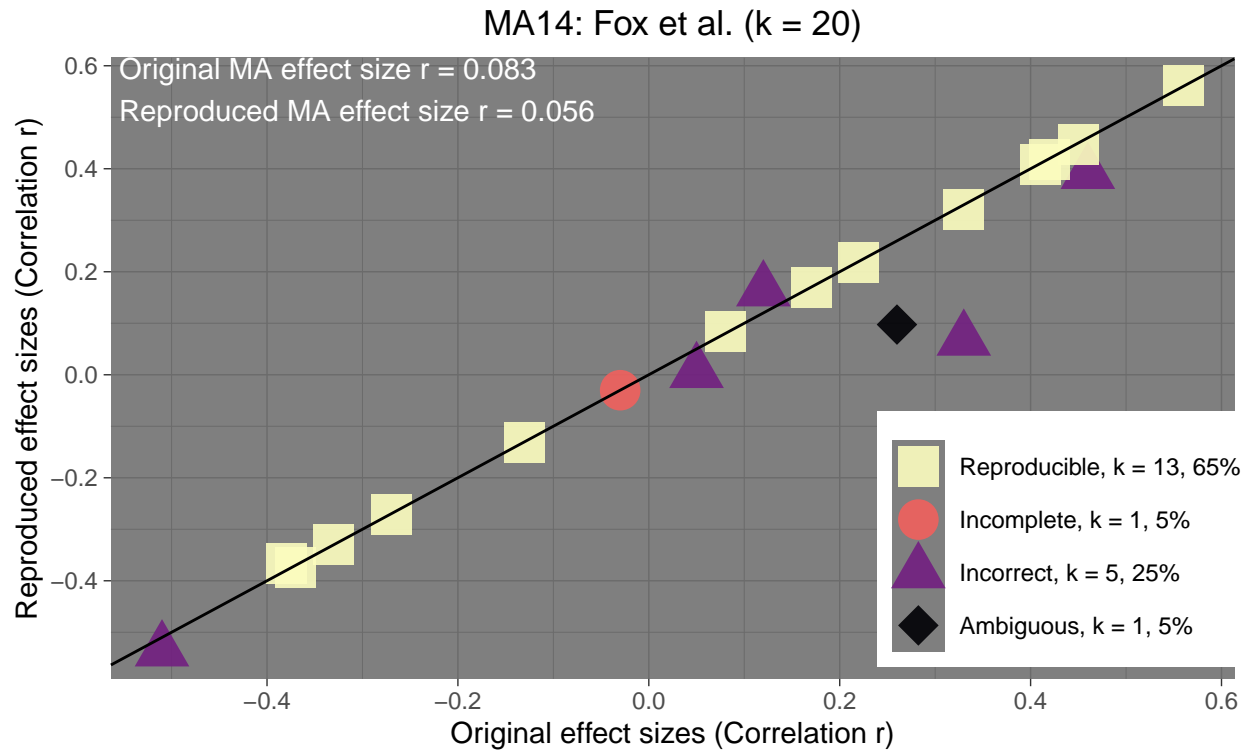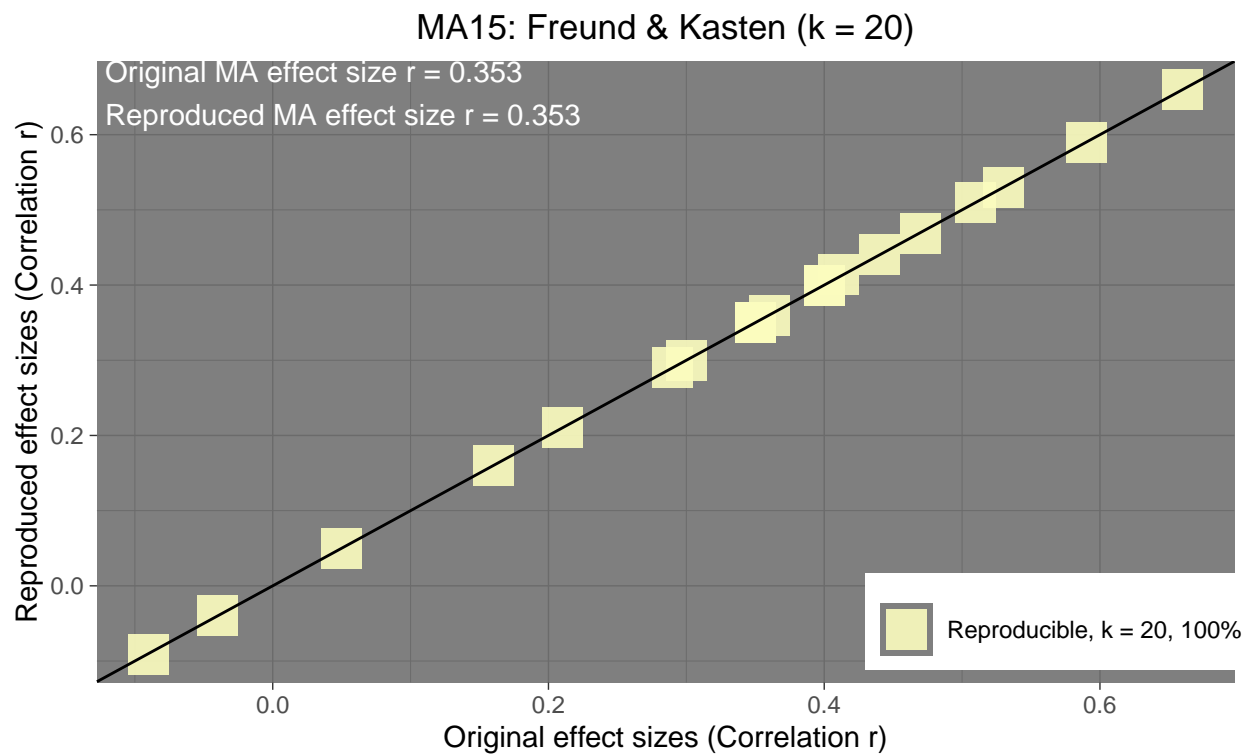



### MA16: Green & Rosenfeld (k = 13)

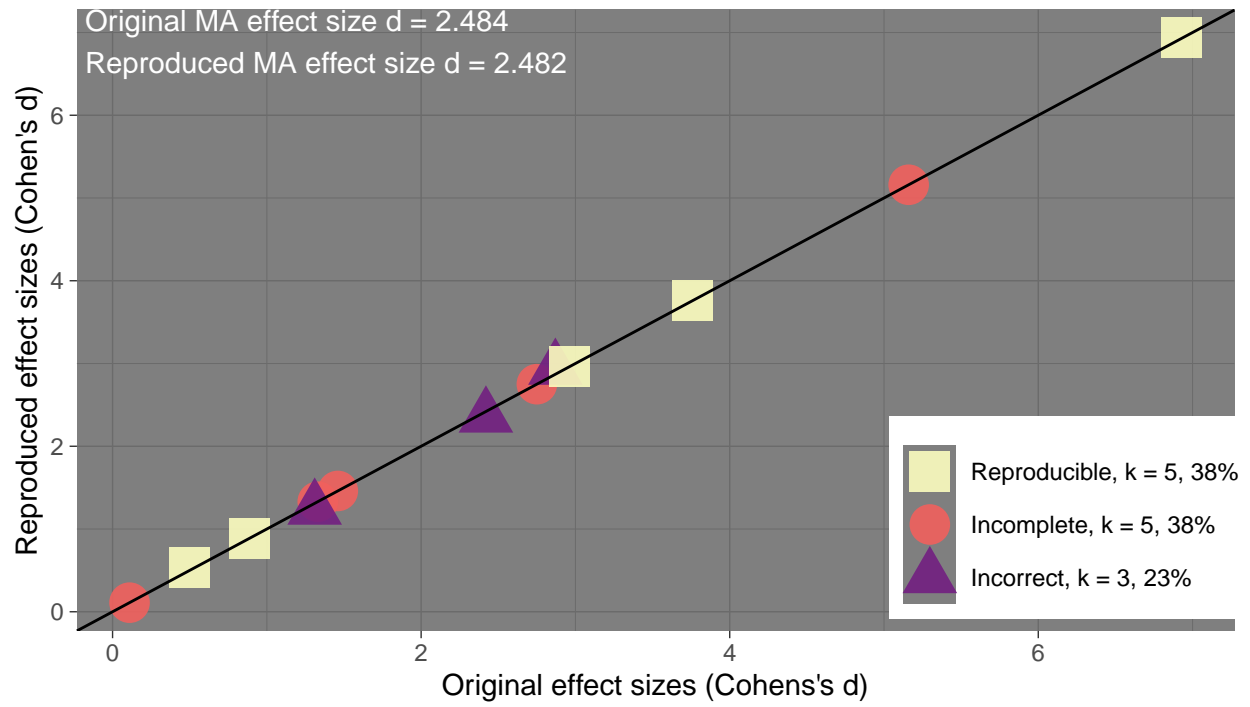

### MA17: Hallion & Ruscio (k = 11)

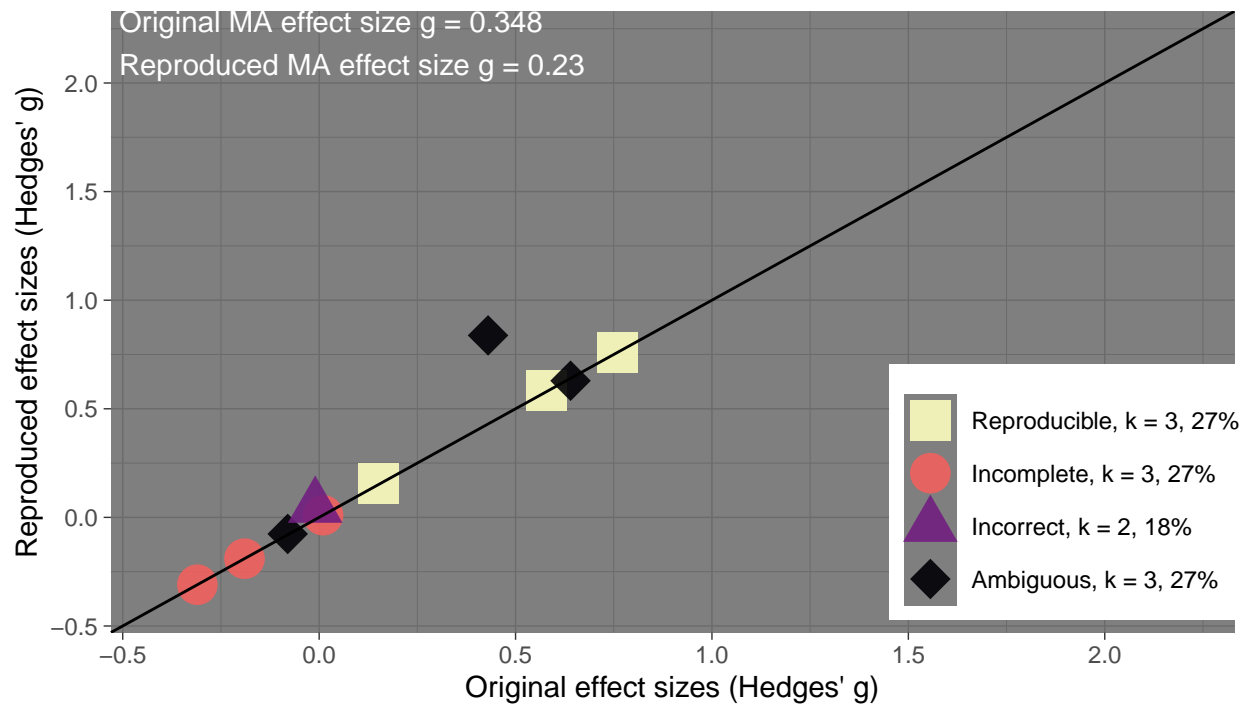

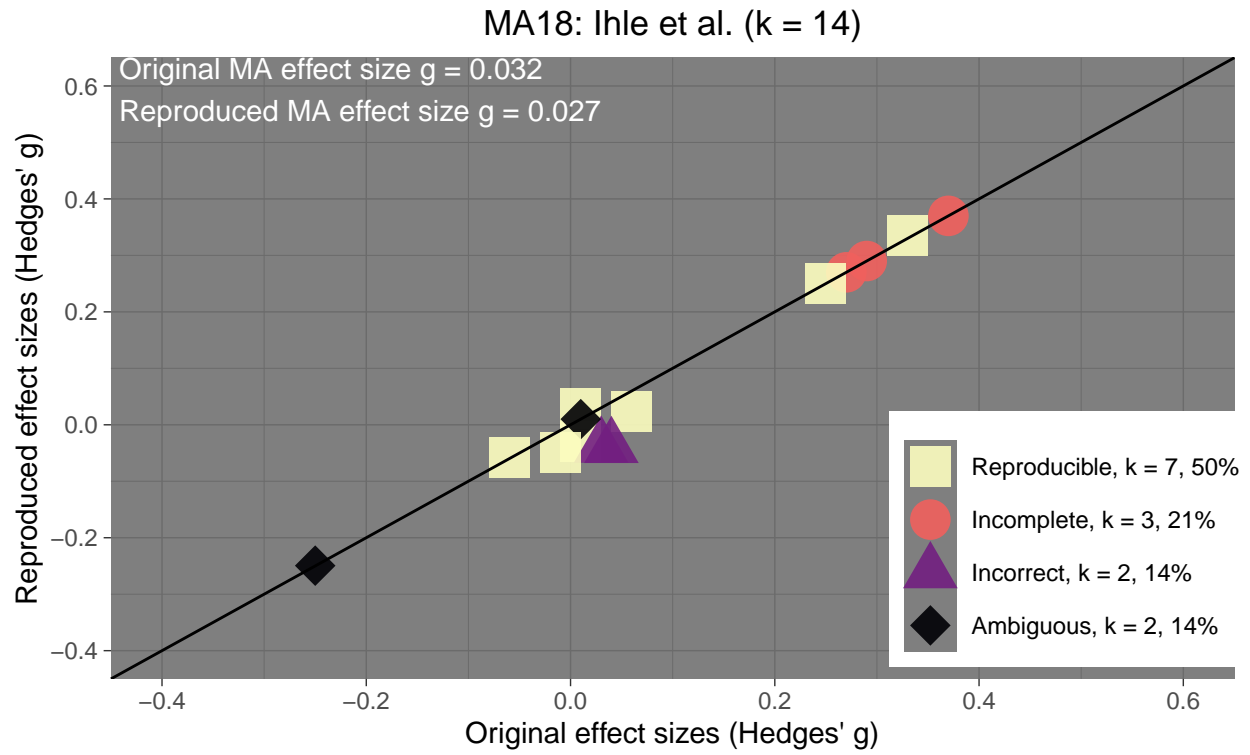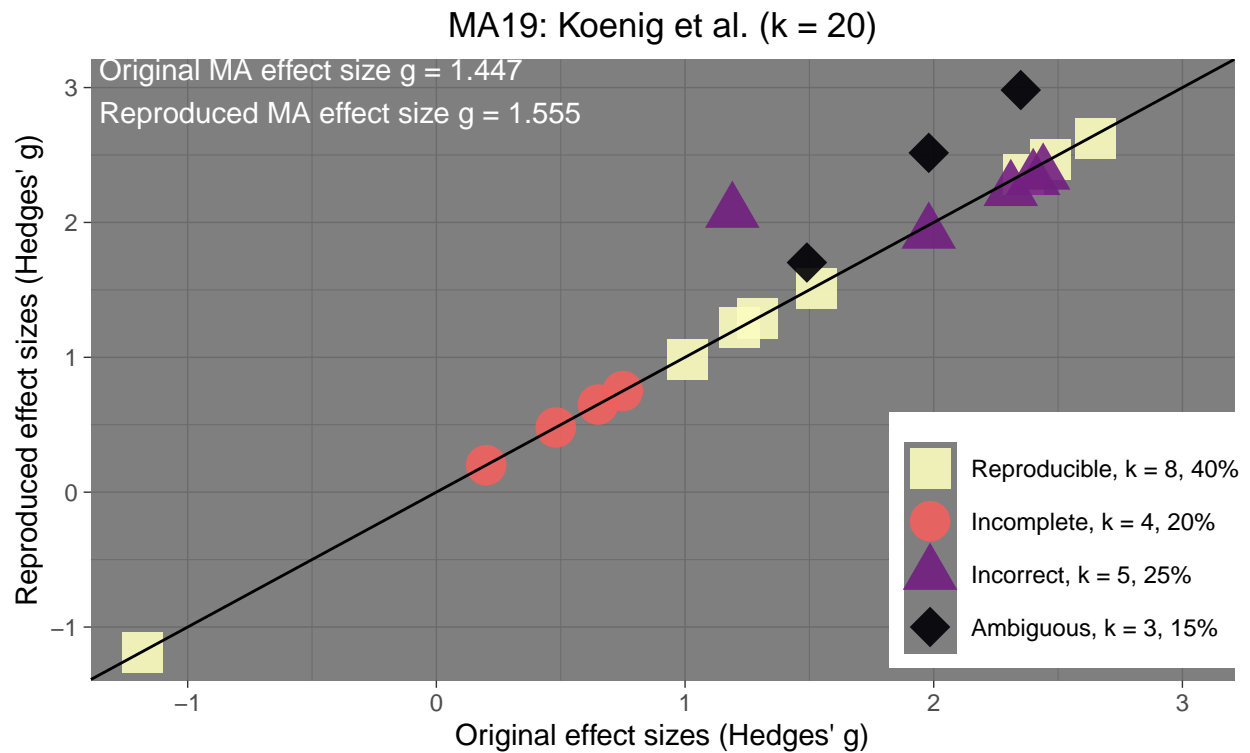

MA20: Kolden et al. (k = 10)

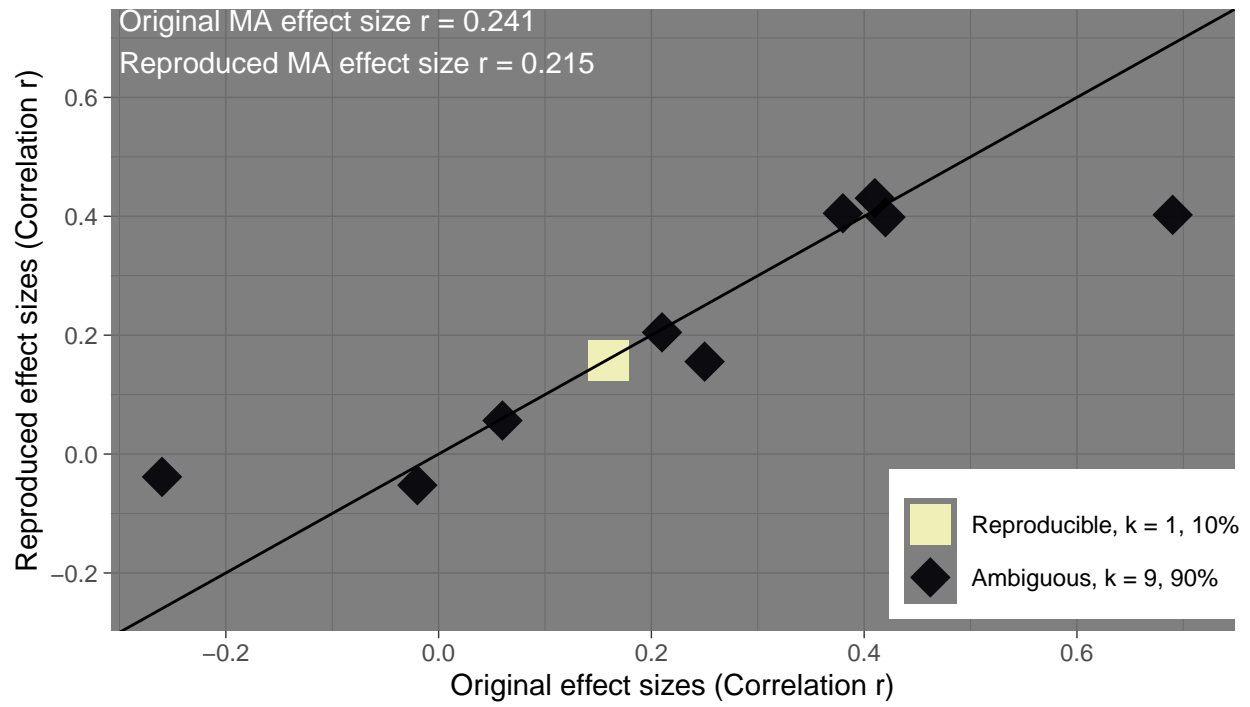

MA21: Lucassen et al. (k = 10)

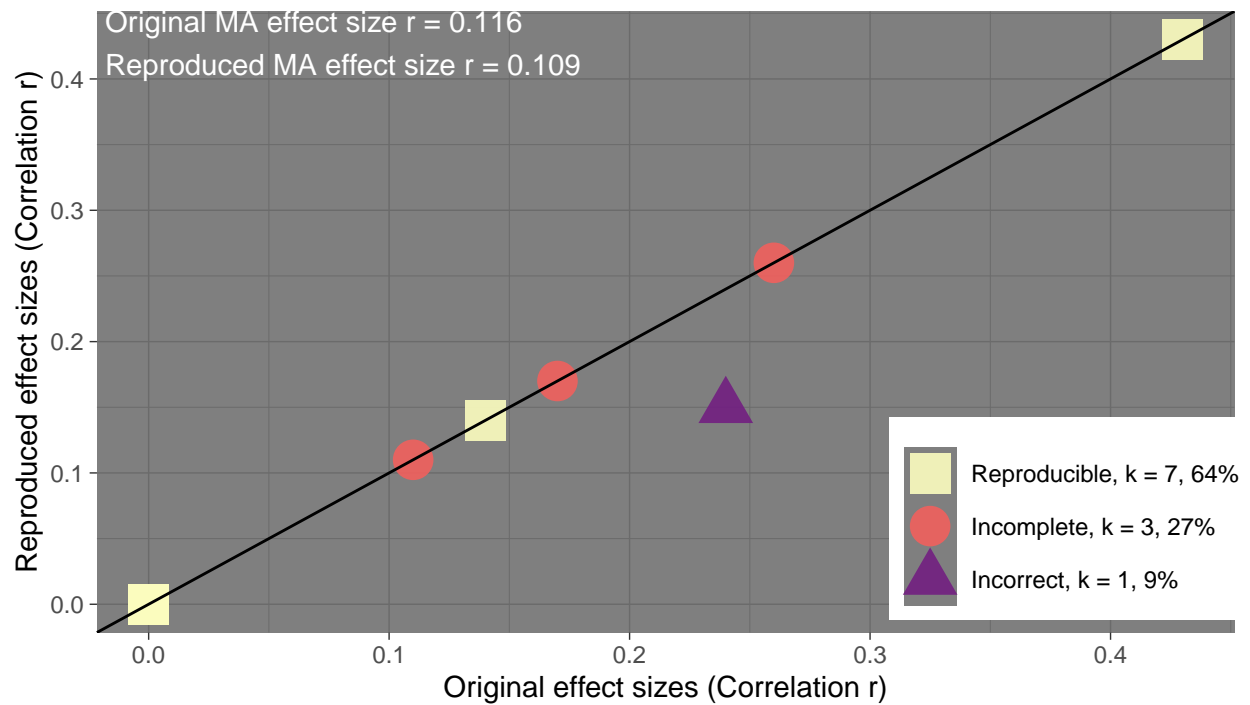

MA22: Mol & Bus (k = 8)

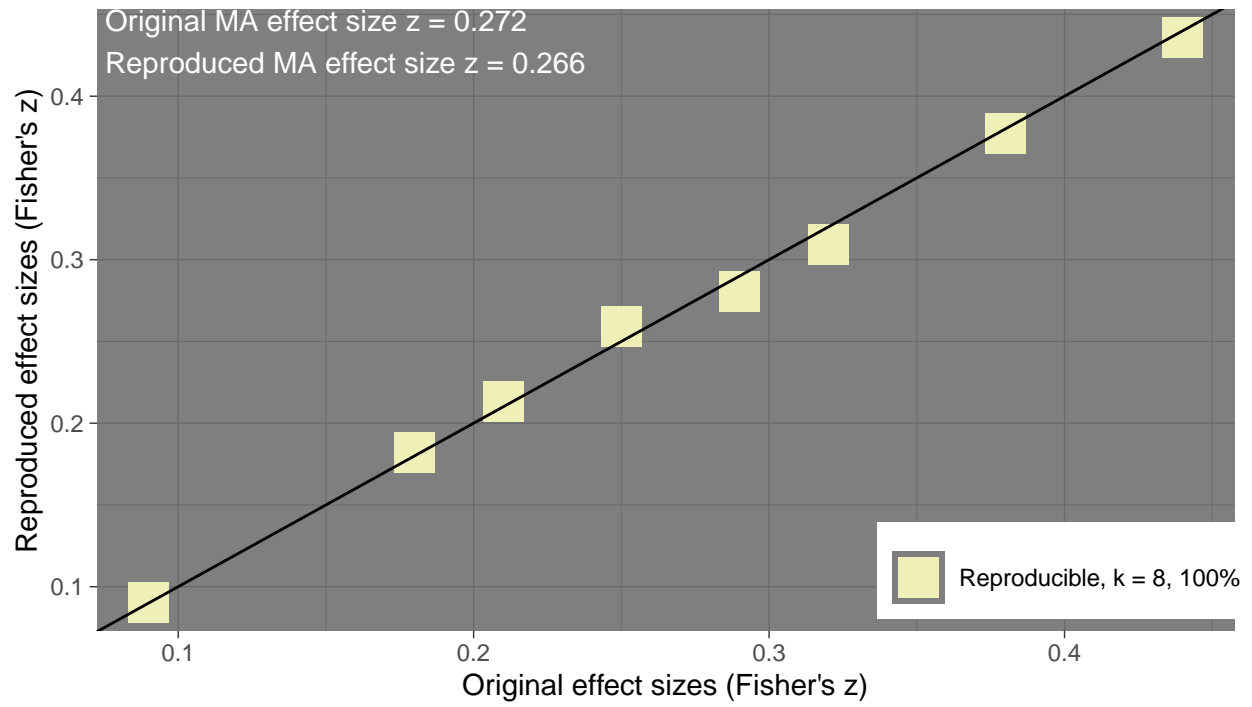

MA23: Morgan et al. (k = 9)

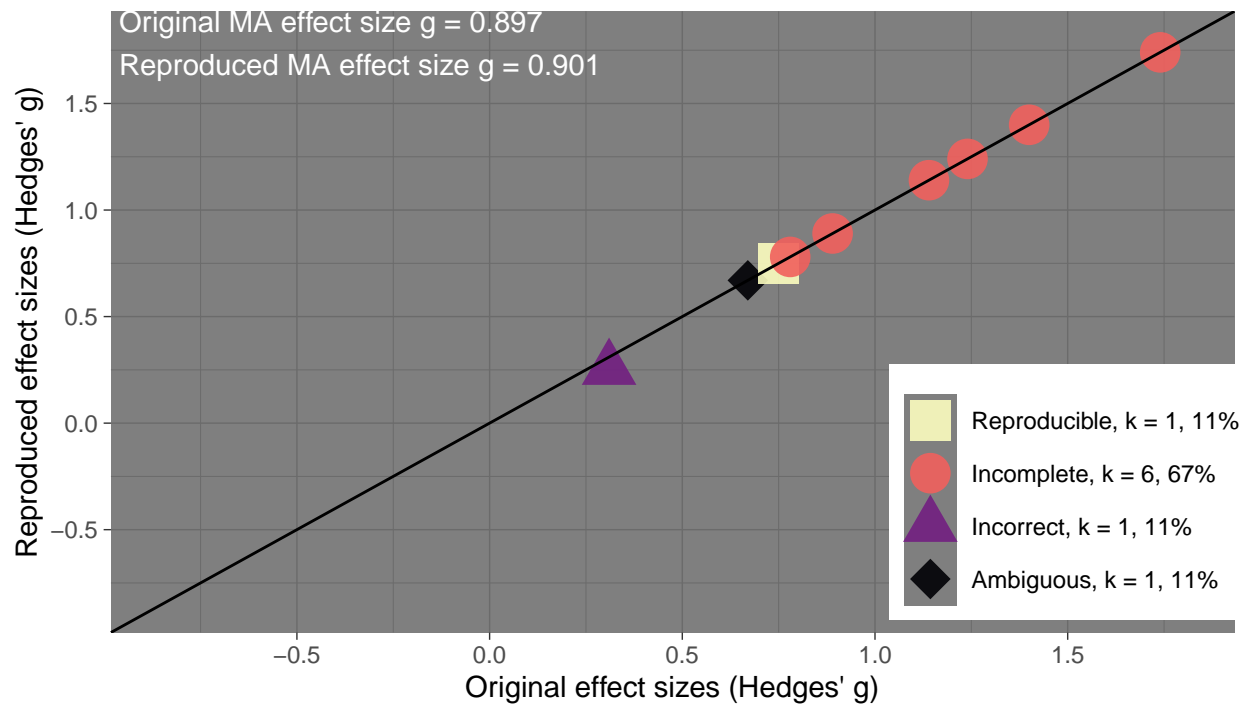

MA24: Munder et al. ( $k = 16$ )

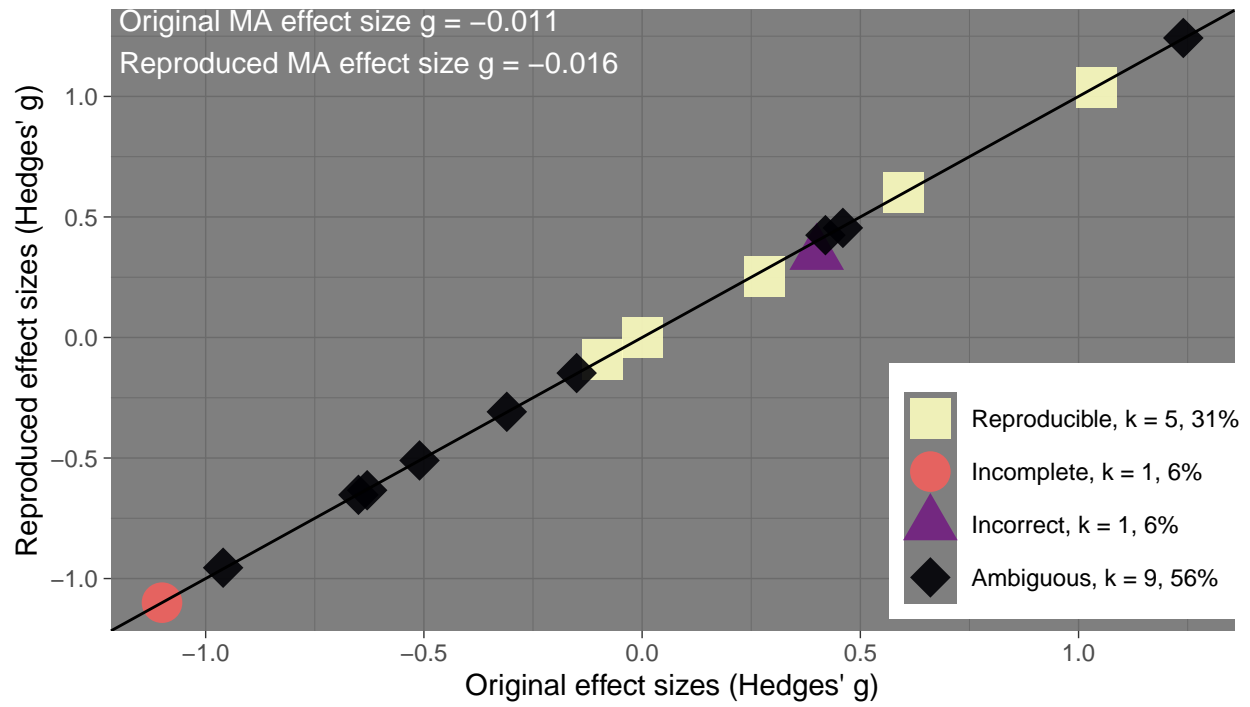

MA25: Piet et al. ( $k = 8$ )

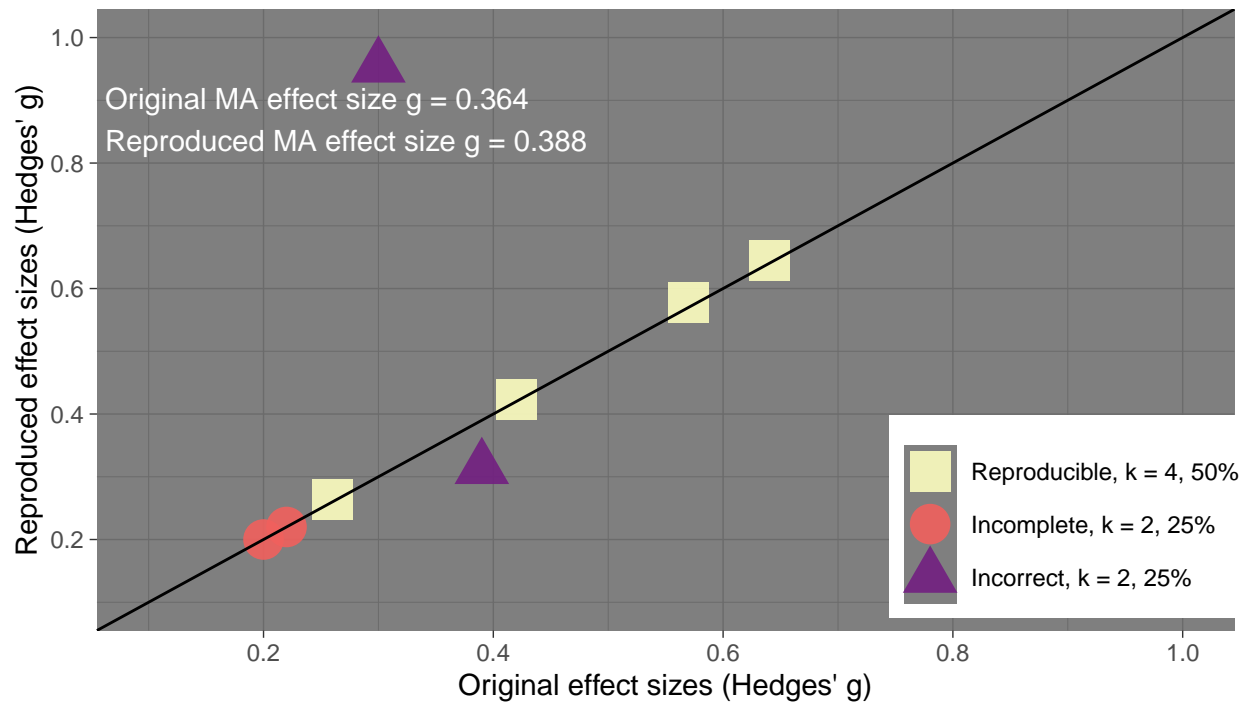

### MA26: Smith & Silva (k = 21)

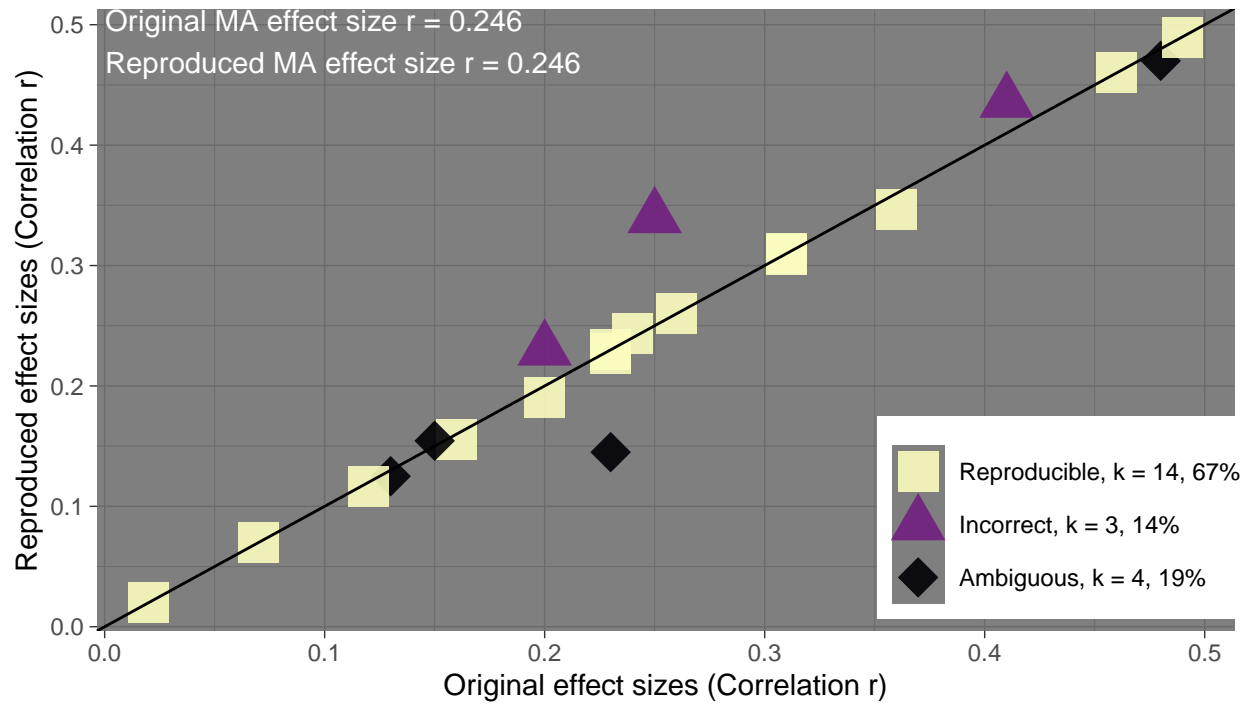

### MA27: Tillman (k = 19)

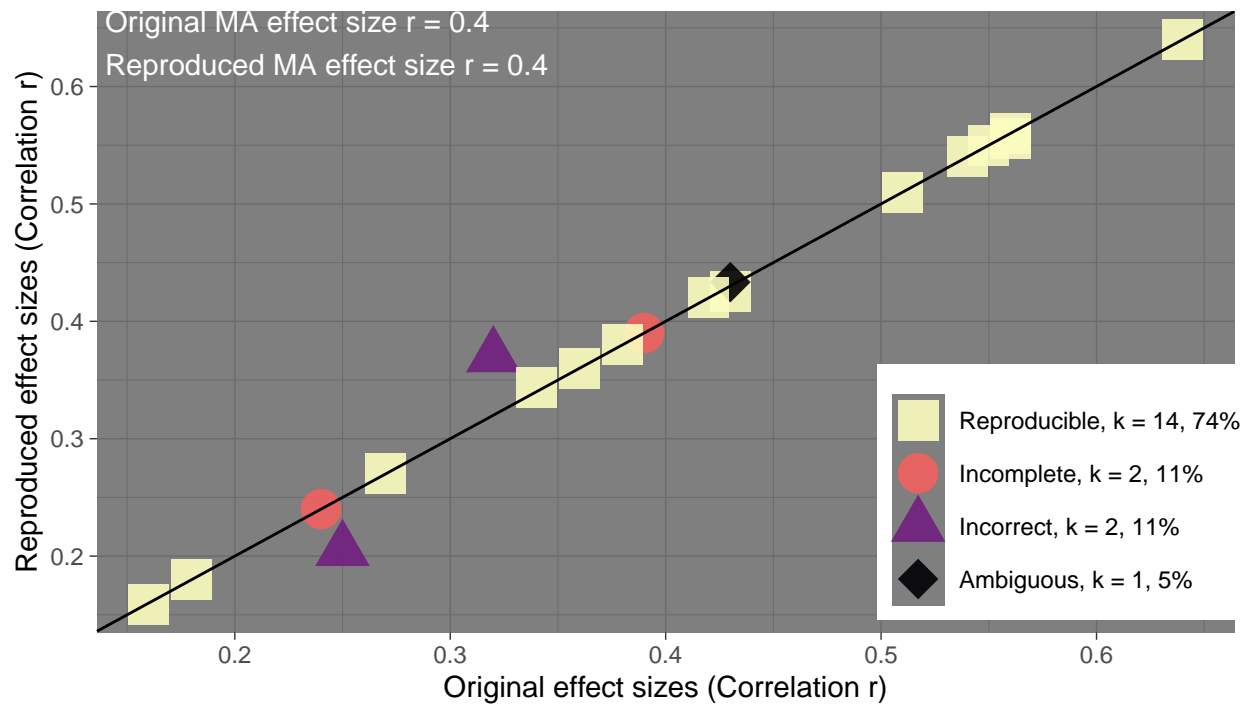

MA28: Toosi (k = 20)

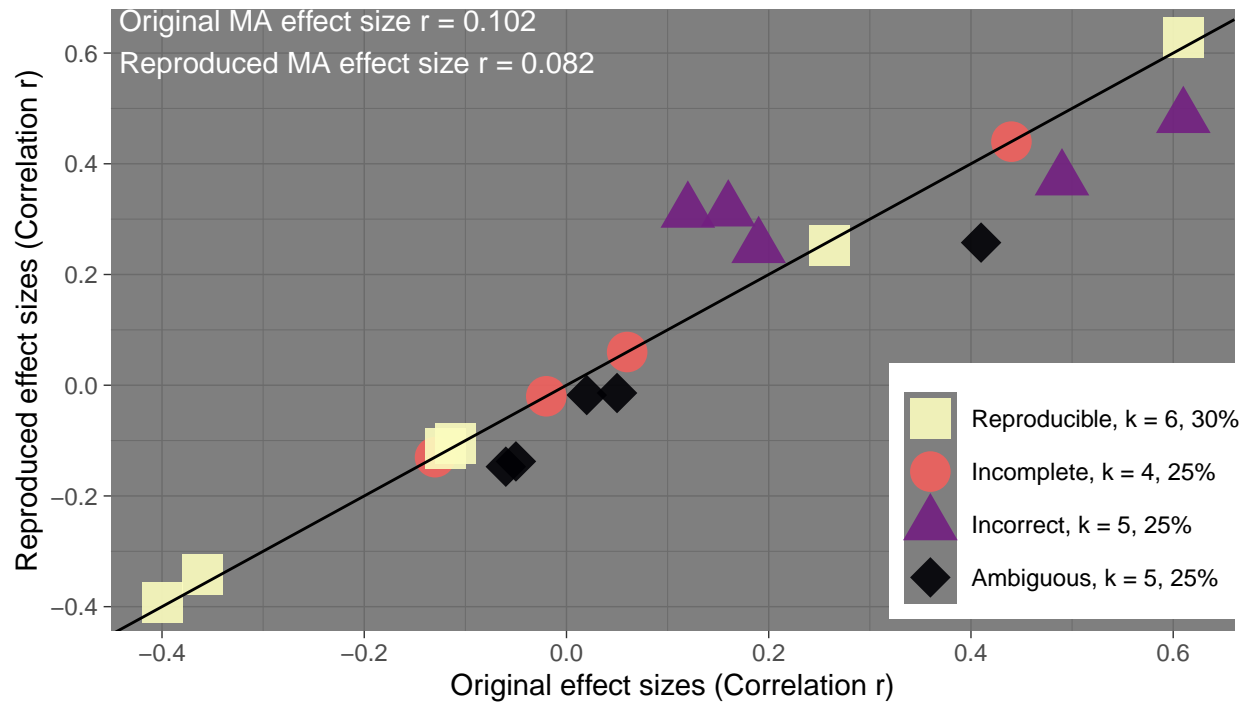

MA29: van Iddekinge (k = 10)

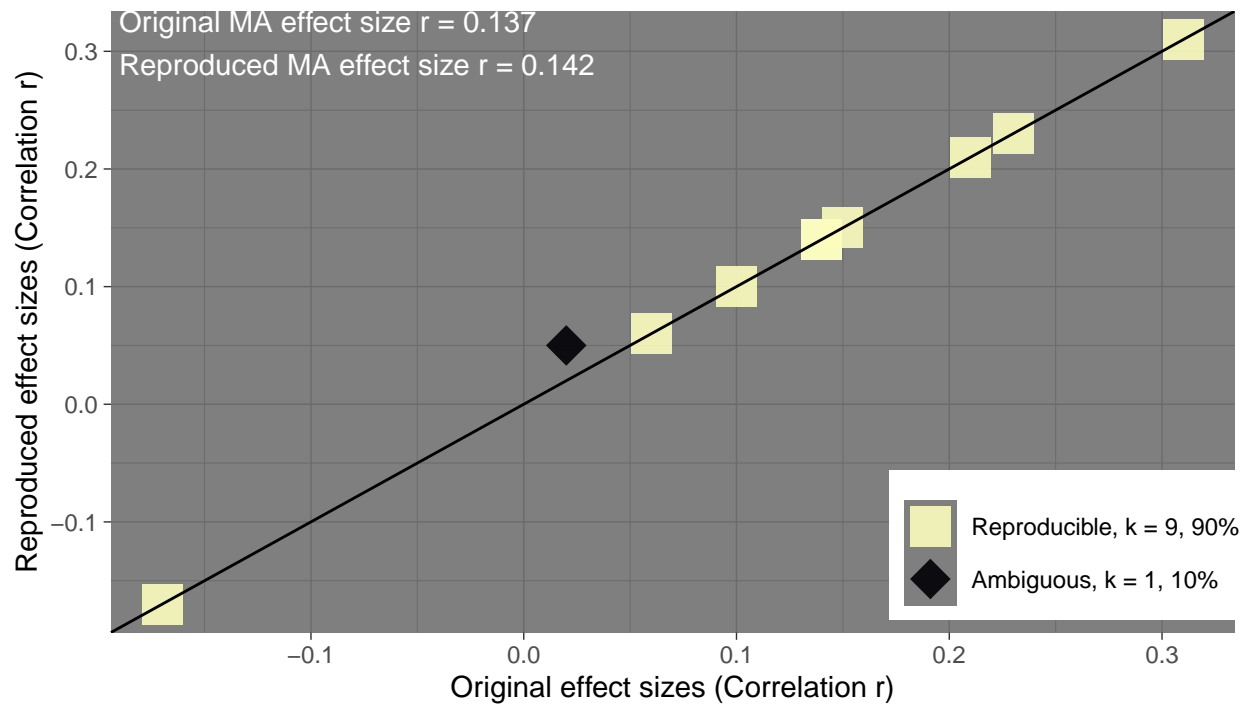

MA30: Webb et al. ( $k = 20$ )

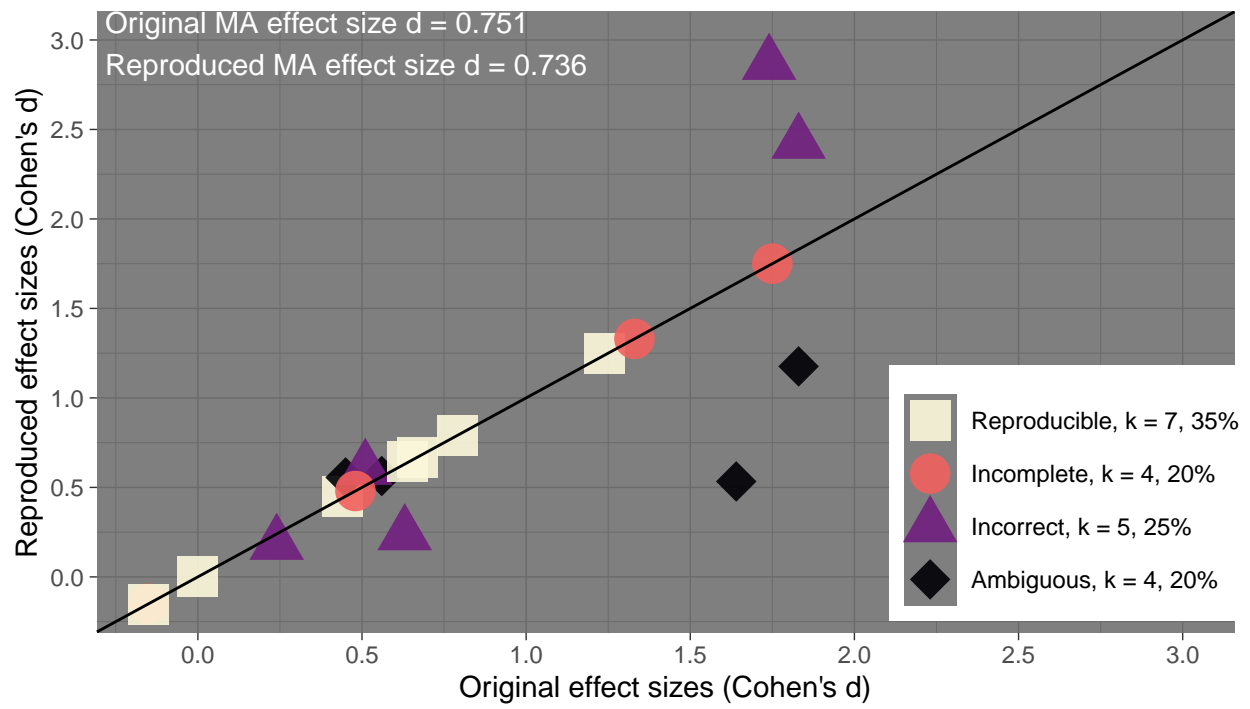

MA31: Woodin ( $k = 13$ )

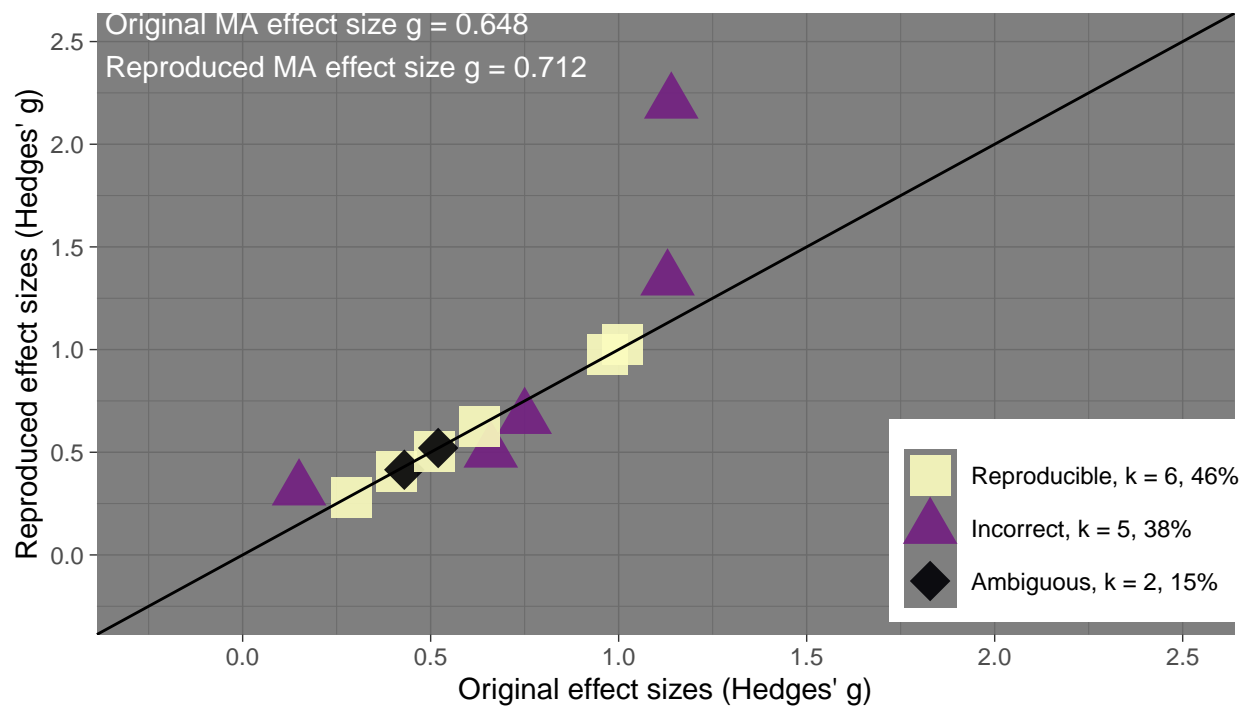



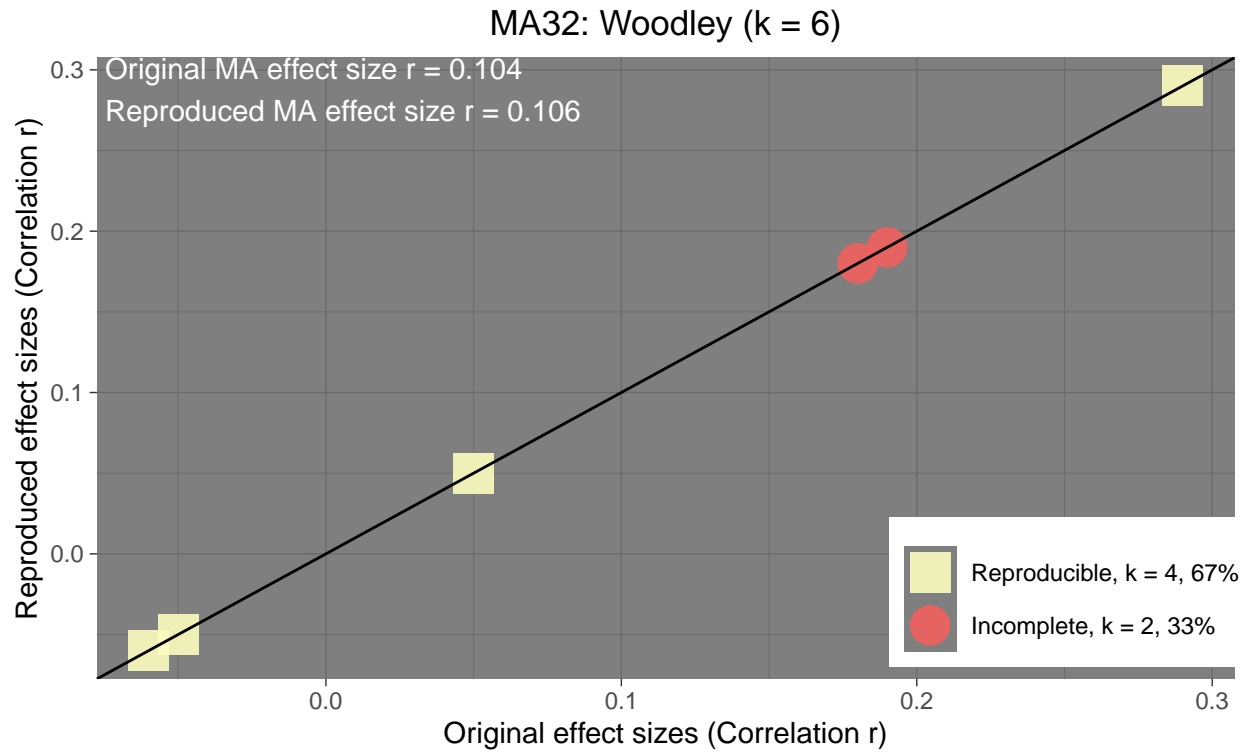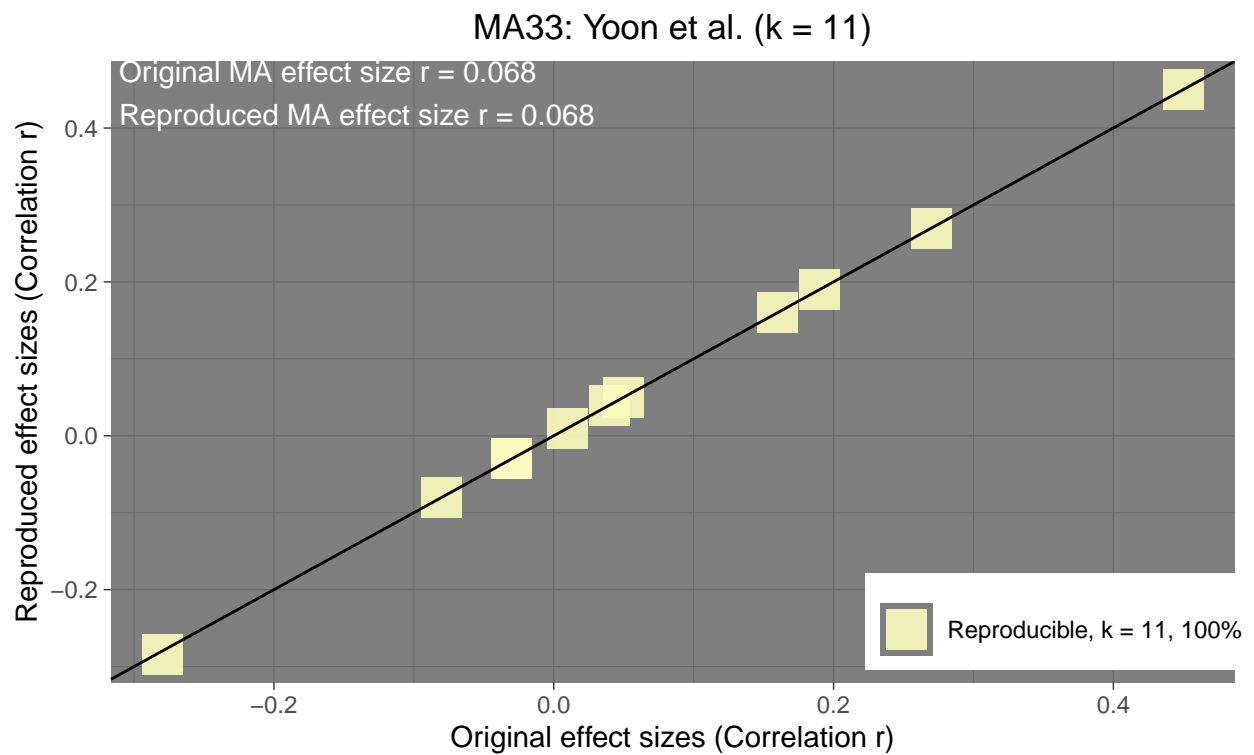

Supplement: S4 (10.1371/journal.pone.0233107.s004) [file journal.pone.0233107.s004]
